# Supplementary material
Source: PubMed Central journal article supplement (PMC5295632)

# Supplementary Figure 1

Figure 1b

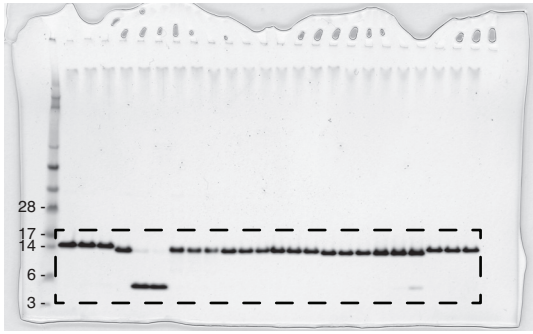

Figure 1f (top)

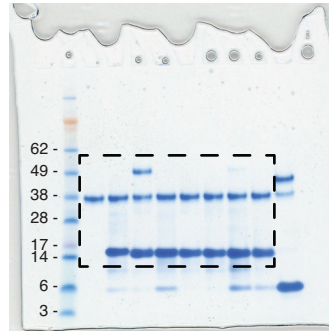

Figure 1f (bottom)

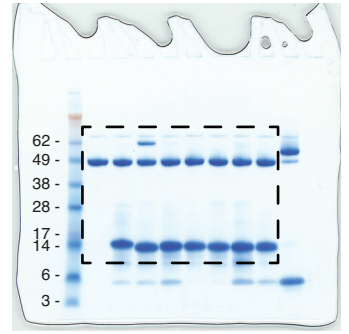

Figure 3b

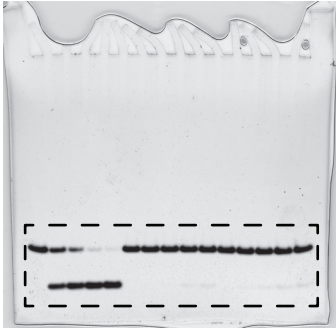

Figure 3d

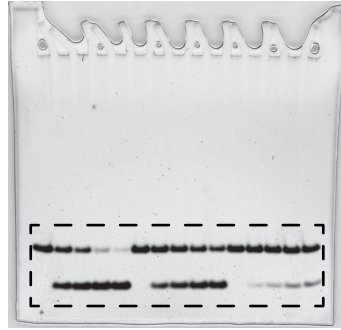

Figure 3f (left)

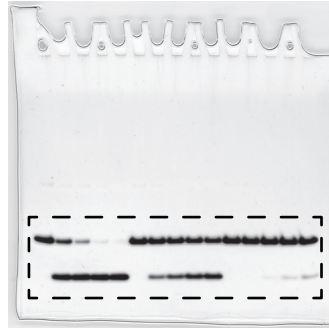

Figure 3f (right)

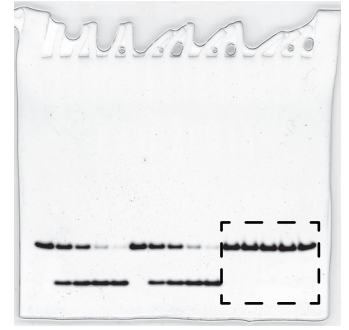

Figure 3g

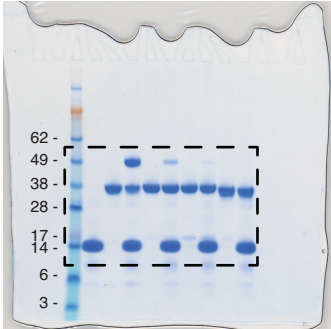

Ext. Data Figure 1a (left, top)

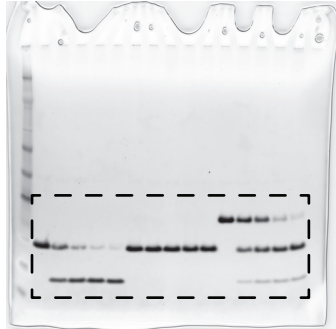

Ext. Data Figure 1a (left, bottom)

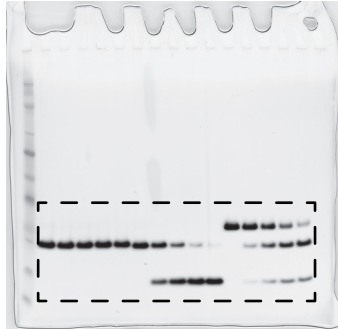

Ext. Data Figure 1a (right, top)

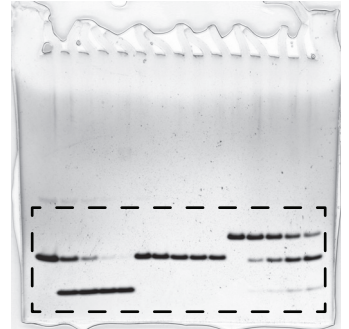

Ext. Data Figure 1a (right, bottom)

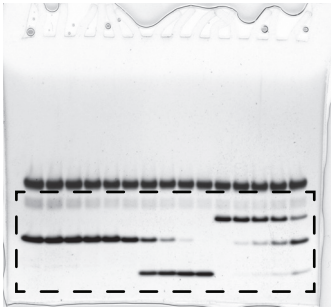

Extended Data Figure 5c

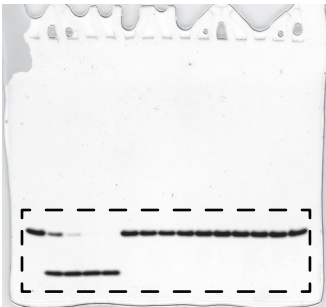

Extended Data Figure 5g (left)

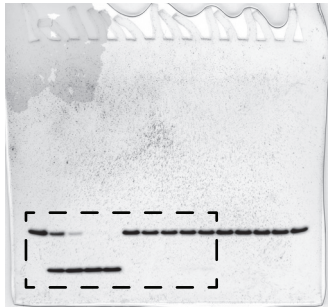

Extended Data Figure 5g (right)

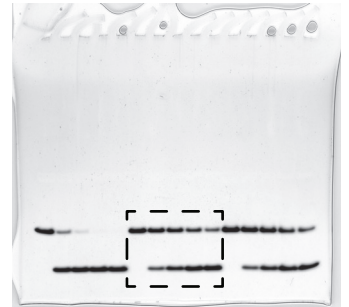

Extended Data Figure 5i

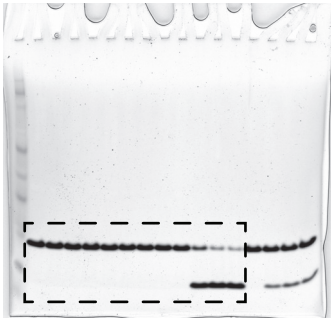

Extended Data Figure 5j (left)

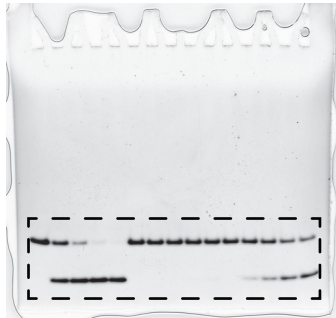

Extended Data Figure 5j (right)

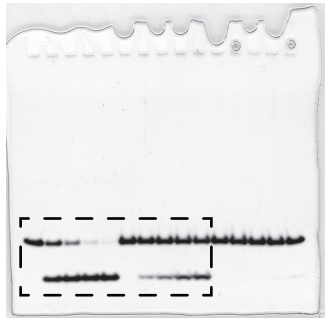

Extended Data Figure 5l

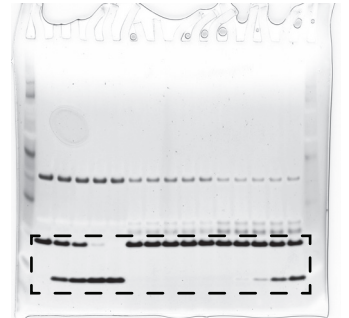

# Supplementary Figure 1 (continued)

Extended Data Figure 8e (top)

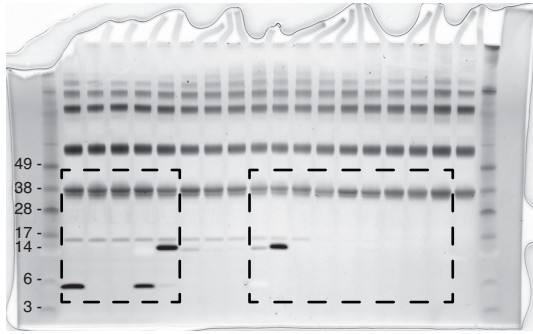

Extended Data Figure 8e (bottom)

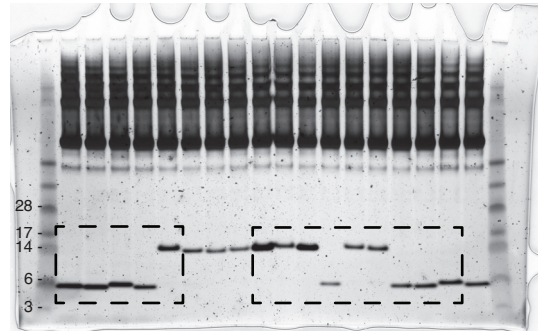

Extended Data Figure 9b (top)

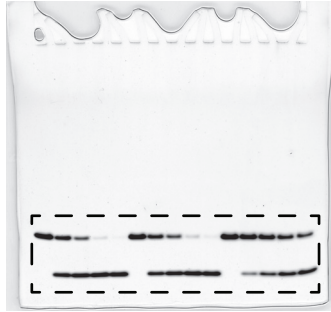

Ext. Data Figure 9b (bottom, left)

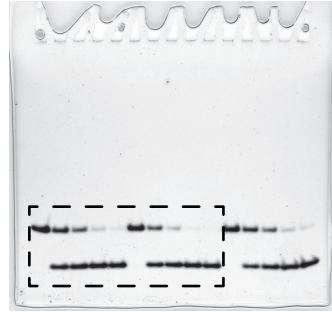

Ext. Data Figure 9b (bottom, right)

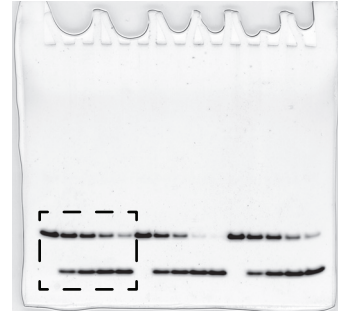

Extended Data Figure 9c

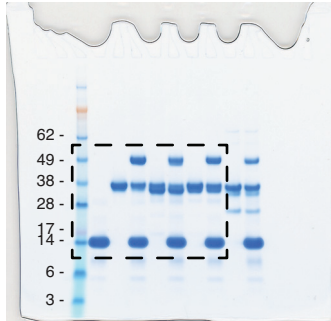

Extended Data Figure 9d

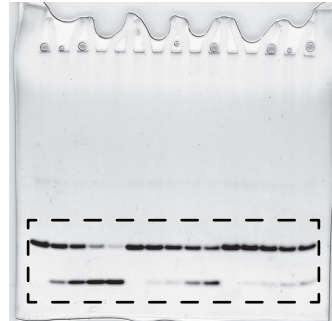

Extended Data Figure 9e

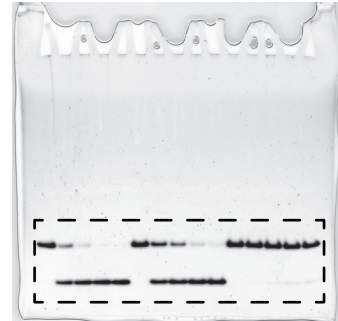

Extended Data Figure 9f

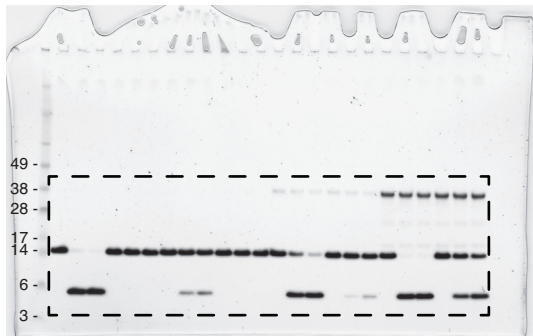

Extended Data Figure 9g

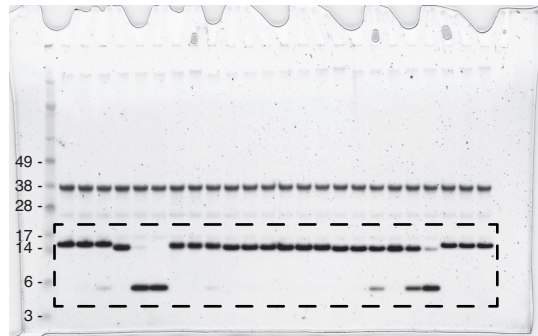

Extended Data Figure 1c

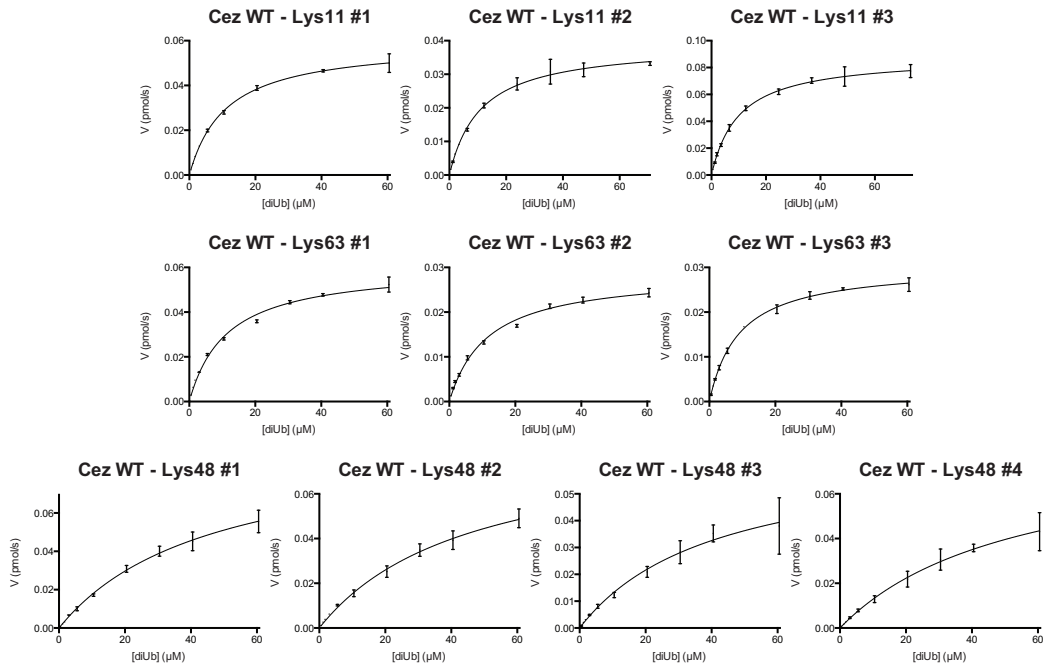

Extended Data Figure 1d

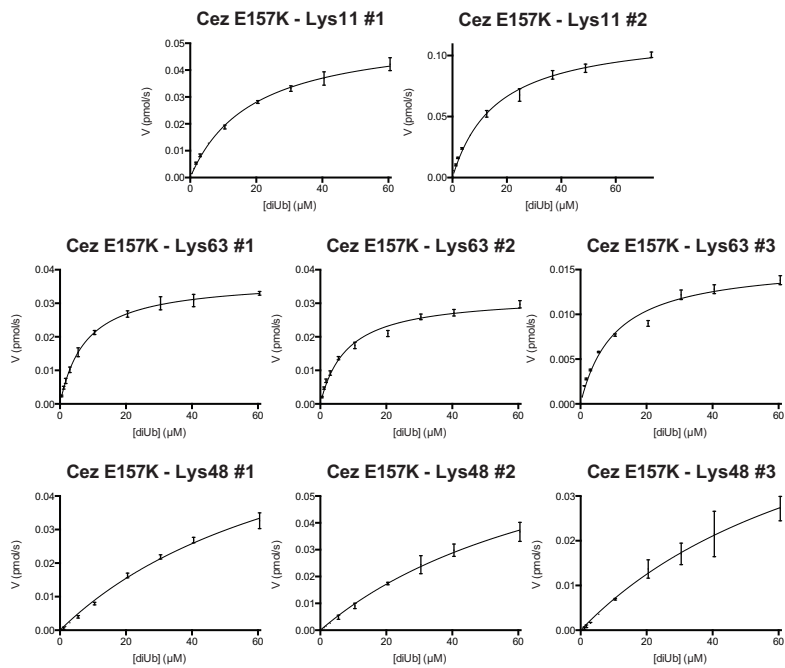

Extended Data Figure 6c

HDX-MS difference heat map (L155G, I156G - WT)

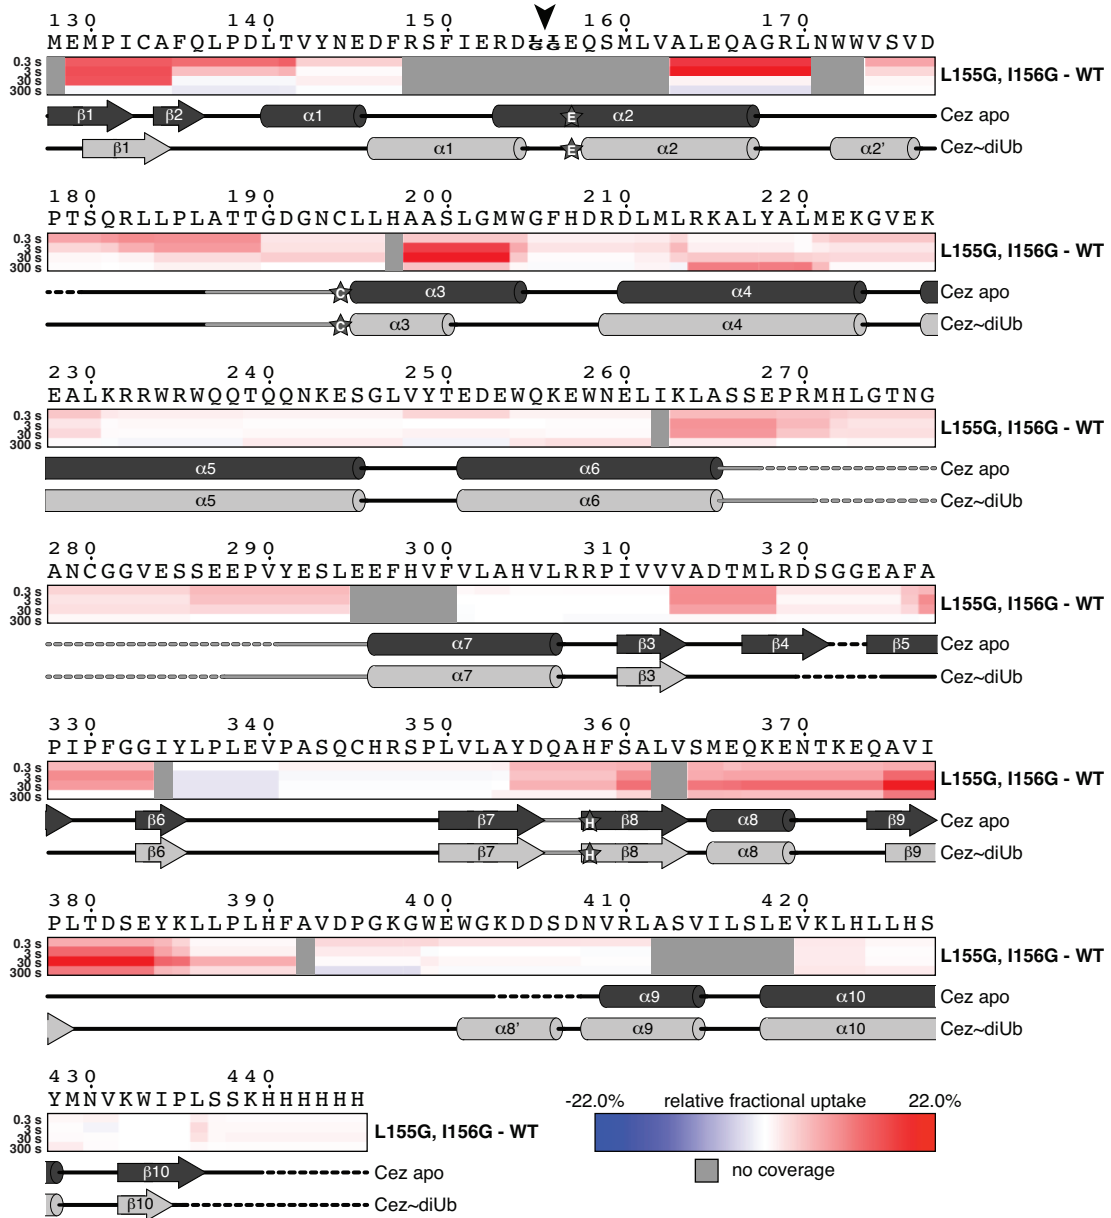

Supplement: NIHMS71205-supplement-Supplementary_Figures.pdf [file NIHMS71205-supplement-Supplementary_Figures.pdf]
